# Supplementary material for: The interhemispheric gradient of SF 6 in the upper troposphere
Source: Copernicus journal article supplement (doi:10.5194/acp-24-689-2024), 2024-01-17
Supplement: Supplementary file 1 [file acp-24-689-2024-supplement.pdf]

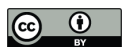

*Supplement of*

## **The interhemispheric gradient of SF<sub>6</sub> in the upper troposphere**

**Tanja J. Schuck et al.**

*Correspondence to:* Tanja J. Schuck ([schuck@iau.uni-frankfurt.de](mailto:schuck@iau.uni-frankfurt.de))

The copyright of individual parts of the supplement might differ from the article licence.

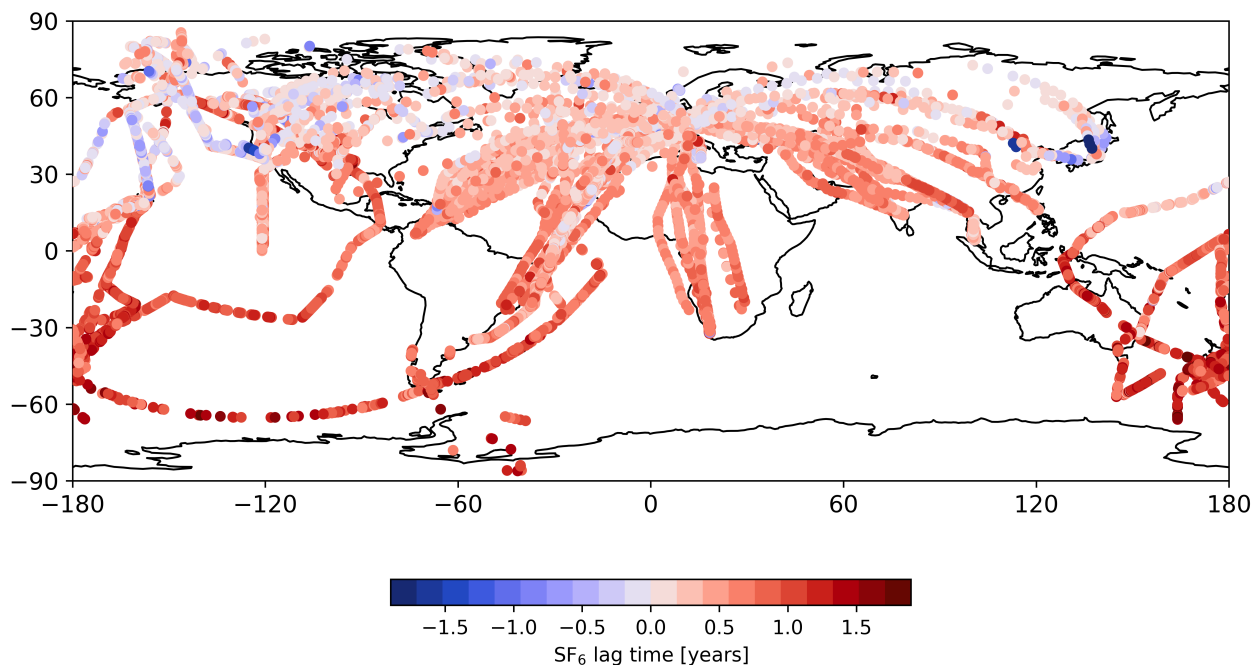

**Figure S1.** Map of all tropospheric measurement locations at altitudes above 400 hPa, excluding stratospheric data, colour-coded by time lag derived from  $\text{SF}_6$  mixing ratios with respect to the northern extra-tropical marine boundary layer north of  $30^\circ \text{N}$ .

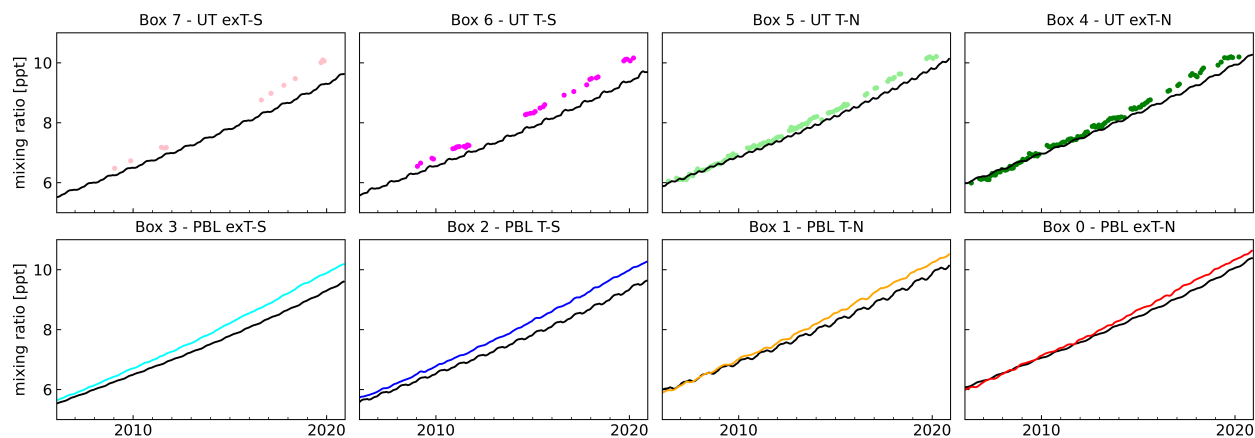

**Figure S2.** Comparison of mixing ratios from the AGAGE 12-box model (black lines) with aircraft observations (Boxes 4, 5, 6, 7) and measurements at observational sites (Boxes 0, 1, 2, 3).

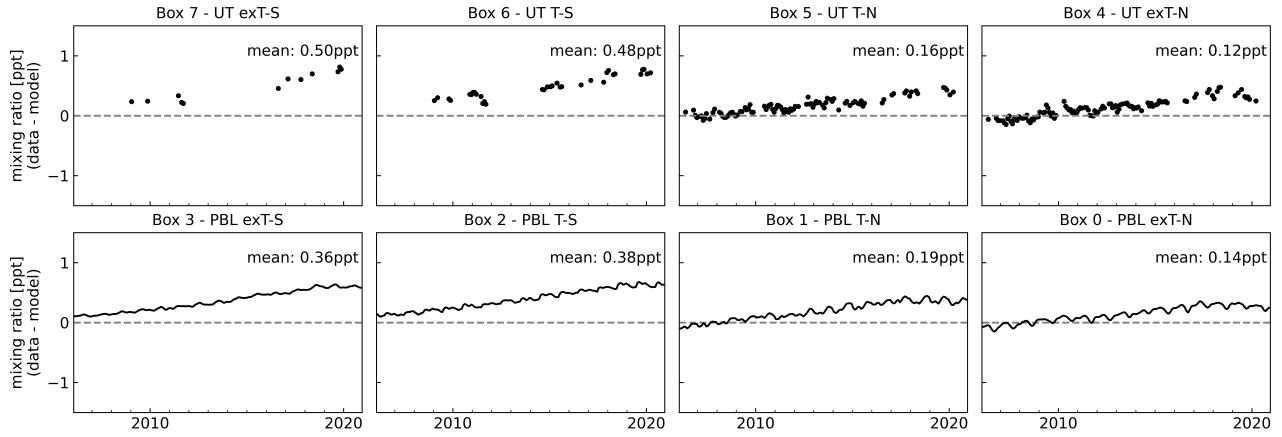

**Figure S3.** Mixing ratio difference per model box as a function of time.

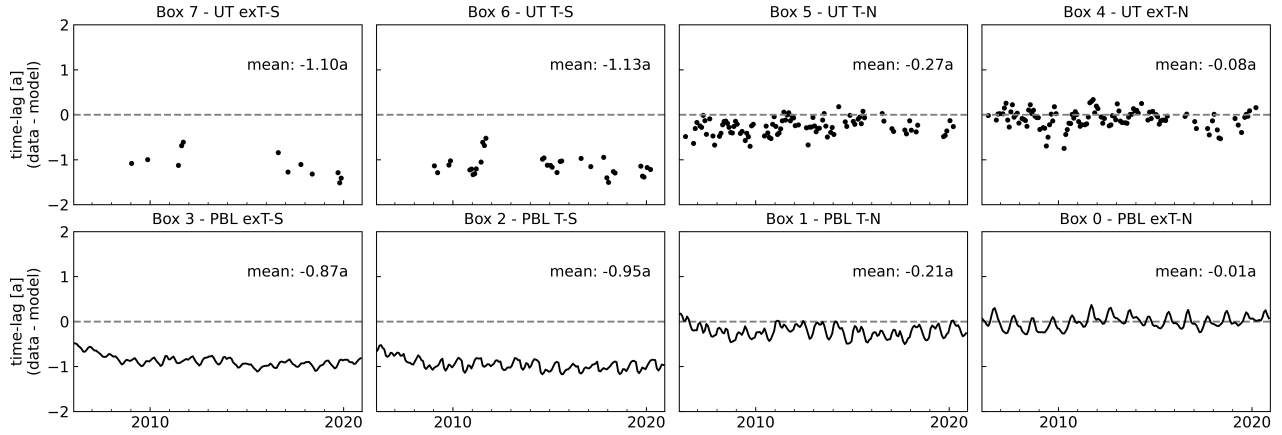

**Figure S4.** Time lag difference per model box as a function of time.

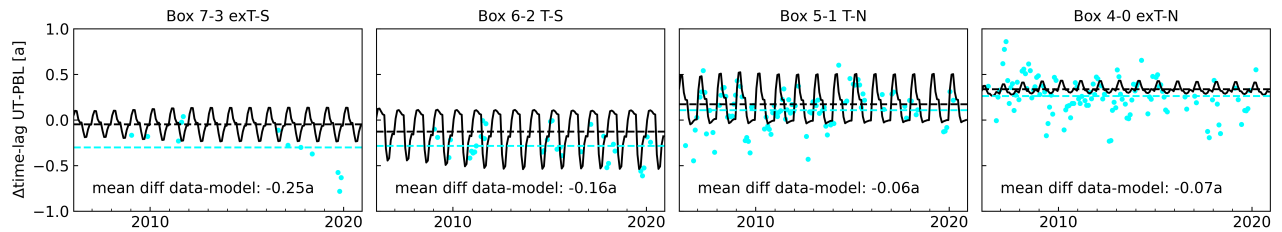

**Figure S5.** Time lag difference between vertically neighbouring boxes for the AGAGE 12-box model (black lines) and observations (coloured lines and symbols).

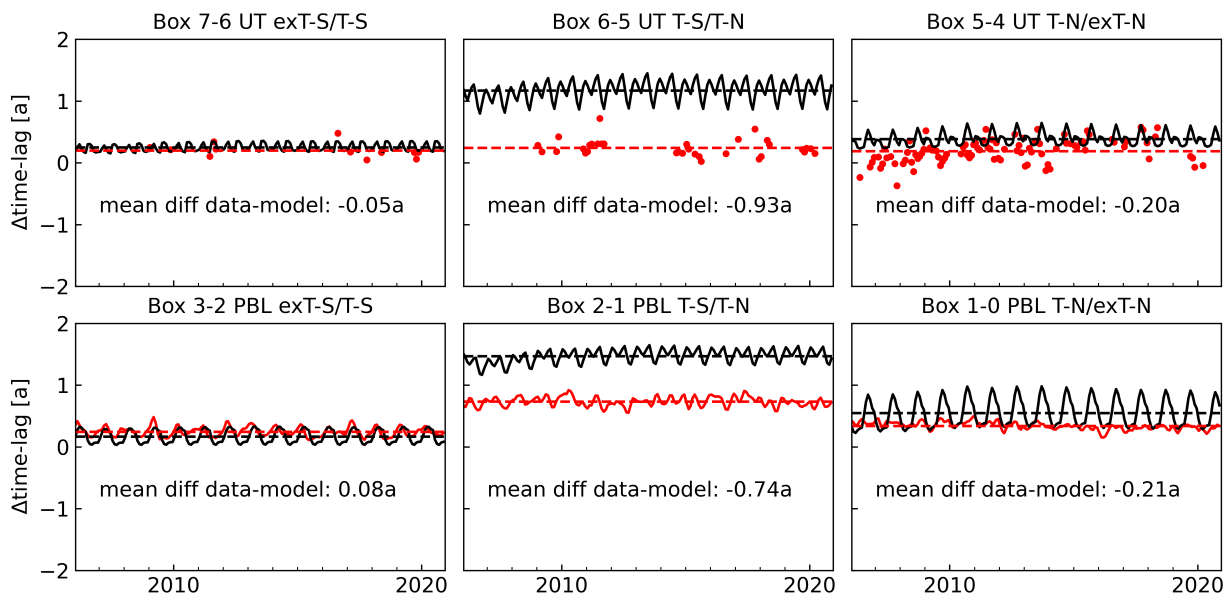

**Figure S6.** Time lag difference between horizontally neighbouring boxes for the AGAGE 12-box model (black lines) and observations (coloured lines and symbols).

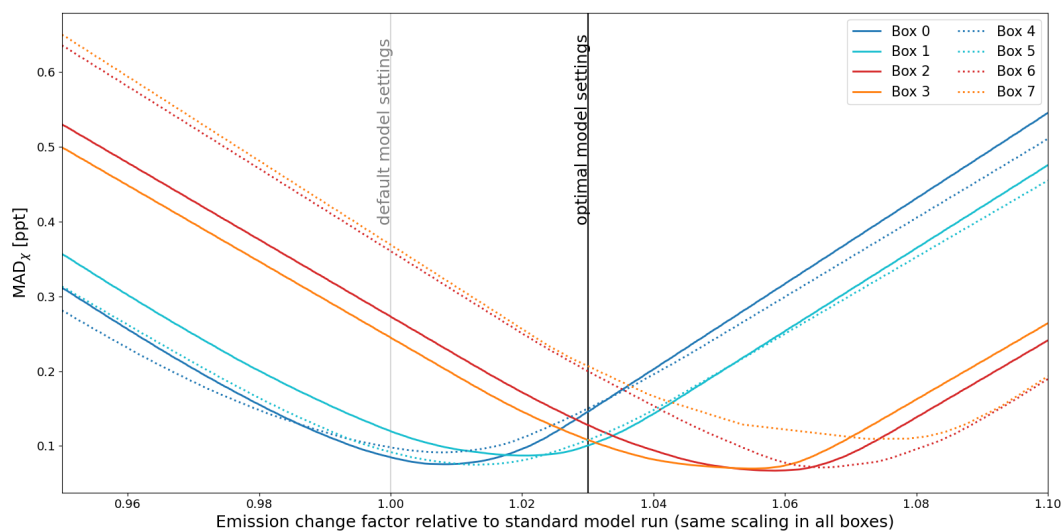

**Figure S7.** Mean absolute deviation of modelled and observed mixing ratios in the lower troposphere for all model boxes. The lowest overall MAD is obtained for an upscaling of EDGAR 7.0 emissions by 3.25 % indicated by the black vertical line.
